# Supplementary material for: Deciphering Interactions Involved in Immobilized Metal Ion Affinity Chromatography and Surface Plasmon Resonance for Validating the Analogy between Both Technologies
Source: MDPI journal article supplement (doi:10.3390/inorganics12010031), 2024-01-16
Supplement: s1 [file s1]

## Supplementary Data

### Data S1

Major pea proteins are divided in 4 categories: legumin, vicilin, albumin and convicilin [1–3]. These proteins names were entered in UniProtKB, 36 protein sequences were obtained for *Pisum Sativum* pea specie, among which, the repeated ones and sequences within the same category with more than 90% of similarities in the AA composition were removed. A final list of 10 main protein sequences were selected from which peptides sequences were obtained using theoretical hydrolysis. 10 proteins selected and their sequences are listed below:

#### 1. Legumin A, 59 kDa with 517 amino acids

MAKLLALSLSFCLLLGGCFALREQPQQNECQLERLDALEPDNRIESEGGLIETWNPNNKQFRCAGVALSR  
ATLQRNALRRPYYSNAPQEIFIQQGNGYFGMVFPGPCPETFEEPQESEQGEGRRYRDRHQKVNRFREGDII  
AVPTGIVFWMYNDQDTPVIAVSLTDIRSSNNQLDQMPPRRFYLAGNHEQEFLQYQHQQGGKQEQENEG  
NNIFSGFKRDYLEDAFNVNHRHIVDRLQGRNEDEEKGAIVKVKGGLSIISPPEKQARHQGRSRQEEDEDEEK  
QPRHQGRSRQEEEEDEERQPRHQRRRGEEEEEDKKERGGSQKGKSRQQGDNGLEETVCTAKLRLNIG  
PSSSPDIYNPEAGRIKTVTSLDLPVLRWLKLSAEHGSLHKNA MFVPHYNLNANSIIYALKGRARLQVVNCN  
GNTVFDGELEAGRALTVPQNYAVAAKSLSDRFSYVAFKTNDRAGIARLAGTSSVINNLPLDVVAATFNLQ  
RNEARQLKSNNPFKFLVPARESEN RASA

#### 2. Legumin J, 57 kDa with 503 amino acids

MSKPFLSLLSLSLLLFASACLATSSEFDRLNQCQLDSINALEPDHRVESEAGLTETWNPNHPELKCAGVSLIR  
RTIDPNGLHLPSFSPSPQLIFIIQGKGVGLSFPGPCPETYEEPRSSQSRQESRQQQGD SHQKVRFRFRKGDIIA  
IPSGIPYWTYNHGDEPLVAISLLDTSNIANQLDSTPRVFYLGGNPETEFPETQEEQQGRHRQKHSYPVGRR  
SGHHQQEEEEEEQNEGNSVLSGFSSEFLAQTFNTEEDTAKRLRSPRDERSQIVRVEGGLRIIKPKGKEEEEK  
EQSHSHSHREEEEEEEEEEDEEEKQRSEERKNGLEETICSAKIRENIADAARADLYNPRAGRISTANSLTLP

VLRYLRLSAEYVRLYRNGIYAPHWNINANSLLYVIRGEGRVIRIVNCQGNTVFDNKVRKGQLVVVPQNFVV  
AEQAGEEEGLEYYVFKTNDRAAVSHVQQVFRATPSEVLANAFGLRQRQVTELKLSGNGRPLVHPRSQSQ  
SH

**3. Legumin L1  $\beta$  chain, 8 kDa with 70 amino acids**

FLEETVCTLKLHEDLAGSSQADVFNPRAGRITSVNSLTLPVLKLLHLSAQWVKLYKNGIFMPHWNLNANS

**4. Legumin L1  $\alpha$  chain, 7 kDa with 58 amino acids**

RQLPRQPSELYECQLDTIHAREPDNRYDSEAGFTETWDXTXPDLCAGVSVLKLITNP

**5. Legumin minor small, 65 kDa with 566 amino acids**

MARHFLSSFSLCFLFFTACLAHHSSEDRFNQCQLDTINALEPDHRVESEAGLTETWNPNHPELKCAGVSL  
IRRTIDPNGLHLPSYSPSPQLIFIIQGKGVGLAVPGCPETYEPRSQSRRQQQQRDSHQKIRRFSGDVI  
PPGIPYWTYNHGHEPLVAITLLDTSNTLNQLDSTPRVFYLGGNPEIEFPETQQKQHEPRQQRYSLVGRR  
GGQQQEEEEEEQNEGNSVLSGFNVEFLAHS LNTKEDTAKRLRSPQDERGQIVKVEDGLH IISPELQEEEEQ  
SHSQRKEEEEEEEQEQRHRK HSKKEDEDEDEEEEEEREQRHRK HSEKEEDEDDEPRSYETRRKWKKHTAEK  
ERESHGQGEEEEEELEKEEEEEEGIQRQHSKGRKNGLEETICSAKIRENIARPSRGDLYNSGAGRISTVNSLT  
PILRNLRLSAEYVLLYRNGIYAPHWNINANSLLYVIRGEGRVIRIVNSEGNKVFDKVSGLQVLVVVPQNFVV  
AQQAGNEEGFEYVFKTNDRAAVSHVNQVFRATPGEVLANAFGLRHSQVAQIKSNGNRGPLVQPQSQ

**6. Vicilin, 52 kDa with 459 amino acids**

MAATTMKASFLLMLMGISFLASVCVSSRDPQNPFIKSNKFQTLFENENGHIRLLQKFDQRSKIFENLQ  
NYRLLEYKSKPHTIFLPQHTDADYILVVLGKAILTVLKPDDRNSFNLERGDTIKLPAGTIAYLVNRDDNEEL  
RVLDLAIPVNRPGQLQSFLSGNQNNQNYLSGFSKNILEASFNTDYEEIEKVLEEHEKETQHRRSLKDKRQ  
QSQEENVIVKLSRGQIEELSKNAKSTSKKSVSSESEPFNLSRGPIYSNEFGKFEITPEKNPQLQDLDFVNS  
VEIKEGSLLLPHYNSRAIVIVTVNEGKGDFELVGQRNENQQEQRKEDDEEEEQGEEIINKVQVQNYKAKLSS

GDV FVIPAGHPVAVKASSNLDLLGFGINAENNQRNFLAGDEDNVISQIQRPVKELAFPGSAQEVDRILEN  
KQKSHFADAQPQQRERGSRETRDRLSSV

#### **7. Vicilin 14 kDa with 124 amino acids**

DRRQELSNENVLVKVSRRLQLEELSKNAKSSRRSVSSESGPFNLRSDDPLYSNNSGKFFELTPEKNQQLQD  
LDFVNSVDLKEGSLLLPNYNSRALLVVLVNEGKGFELVGQRNENQGKEN

#### **8. Convicilin CVCA, 67 kDa with 571 amino acids**

MATTVKSRFPLLLFLGIIFLASVCVTYANYDEGSETRVPGQRERGRQEGEKEEKRHGEWRPSYEKEEHEEE  
KQKYRYQREKKEQKEVQPGRERWEREEDEEQVEEWRGSRREDPEERARLRHREERTKRDRRHQREG  
EEEERSSESQEHRNPFLFKSNKFLTLFENENGHIRRLQRFDKRSDFENLQNYRLVEYRAKPHTIFLPQHIDA  
DLILVVLNGKAILTVLSPNDRNSYNLERGDTIKIPAGTTSYLVNQDDEEDLRVVDFVIPVNRPGKFEAFGLSE  
NKNQYLRGFSKNILEASLNTKYETIEKVLEEQEKPPQQLRDRKRTQQGEERDAIIKVSREQIEELRKLAKSS  
SKKSLPSEFEPFNLRSKPEYSNKFGLFEITPEKKYPQLQDLILVSCVEINKGALMLPHYNSRAIVVLLVNE  
GKGNLELLGLKNEQQEREDRKERNNEVQRYEARLSPGDVVIIPAGHPVAISASSNLNLLGFGINAKNNQR  
NFLSGSDDNVISQIENPVKELTFPGSSQEVNRLIKNQKQSHFASAEPEQKEEESQRKRSPLSSVLDSFY

#### **9. Albumin-2, 26 kDa with 231 amino acids**

MTKTGYINAAFRSSQNNEAYLFINDKYVLLDYAPGTSNDKVLYGPTPVRDGFKSLNQTVFGSYGVDCSFD  
TDNDEAFIFYEKFCALIDYAPHSNKDKIILGPKKIADMFPFFEGTVFENGIDAAYRSTRGKEVYLFKGDQYAR  
IDYETNSMVNKEIKSIRNGFPCFRNTIFESGTDAAFASHKTNEVYFFKGDYYARVTVTPGATDDQIMDGVR  
KTLDYWPSLRGIIPLEN

#### **10. Albumin-1, 14 kDa with 130 amino acids**

MASVKLASLIVLFATLGMFLTKNVGAASCNGVCSPFEMPPCGTSACRCIPVGLVVGYCRNPSGVFLRTND  
EHPNLCESDADCRKKGSGNFCGHYPNPDIYGWCFASKSEAEDFFSKITPKDLLKSVSTA

## Data S2

### Columns specifications

| Column           | HiFloQ1-NiNTA               | HisTrap™FF crude                         |
|------------------|-----------------------------|------------------------------------------|
| Diameter         | 0.7 cm                      | 0.7 cm                                   |
| Height           | 2.5 cm                      | 2.5 cm                                   |
| Bed volume       | 1 mL                        | 1 mL                                     |
| Total porosity   | 0.48                        | n.d                                      |
| Metal ions       | Ni <sup>2+</sup>            | 15 µmol Ni <sup>2+</sup> /ml medium      |
| Complex agent    | Nitrilotriacetic Acid (NTA) | n.d                                      |
| Matrix           | Super Ni-NTA Agarose        | Highly cross-linked spherical Agarose 6% |
| Base matrix      | 7.5% cross-linked Agarose   | -                                        |
| Binding capacity | 50-75 mg                    | 40 mg of 6His tagged protein             |
| Material         | Polypropylene               | Polypropylene                            |
| Storage          | 20% ethanol , 4°C           | 20% ethanol , 4°C                        |

### Reference

- [1] Boye, J., Zare, F., Pletch, A., Pulse proteins: Processing, characterization, functional properties and applications in food and feed. *Food Research International* 2010, 18.
- [2] Tamm, F., Herbst, S., Brodkorb, A., Drusch, S., Functional properties of pea protein hydrolysates in emulsions and spray-dried microcapsules. *Food Hydrocolloids* 2016, 58, 204–214.
- [3] Lam, A. C. Y., Can Karaca, A., Tyler, R. T., Nickerson, M. T., Pea protein isolates: Structure, extraction, and functionality. *Food Reviews International* 2018, 34, 126–147.
